# Supplementary material
Source: Springer Nature journal article supplement (https://www.springermedizin.de/resource/supplementary/12874_2011_700_MOESM4_ESM.pdf/9432952)
Supplement: MOESM4 [file 9432952]

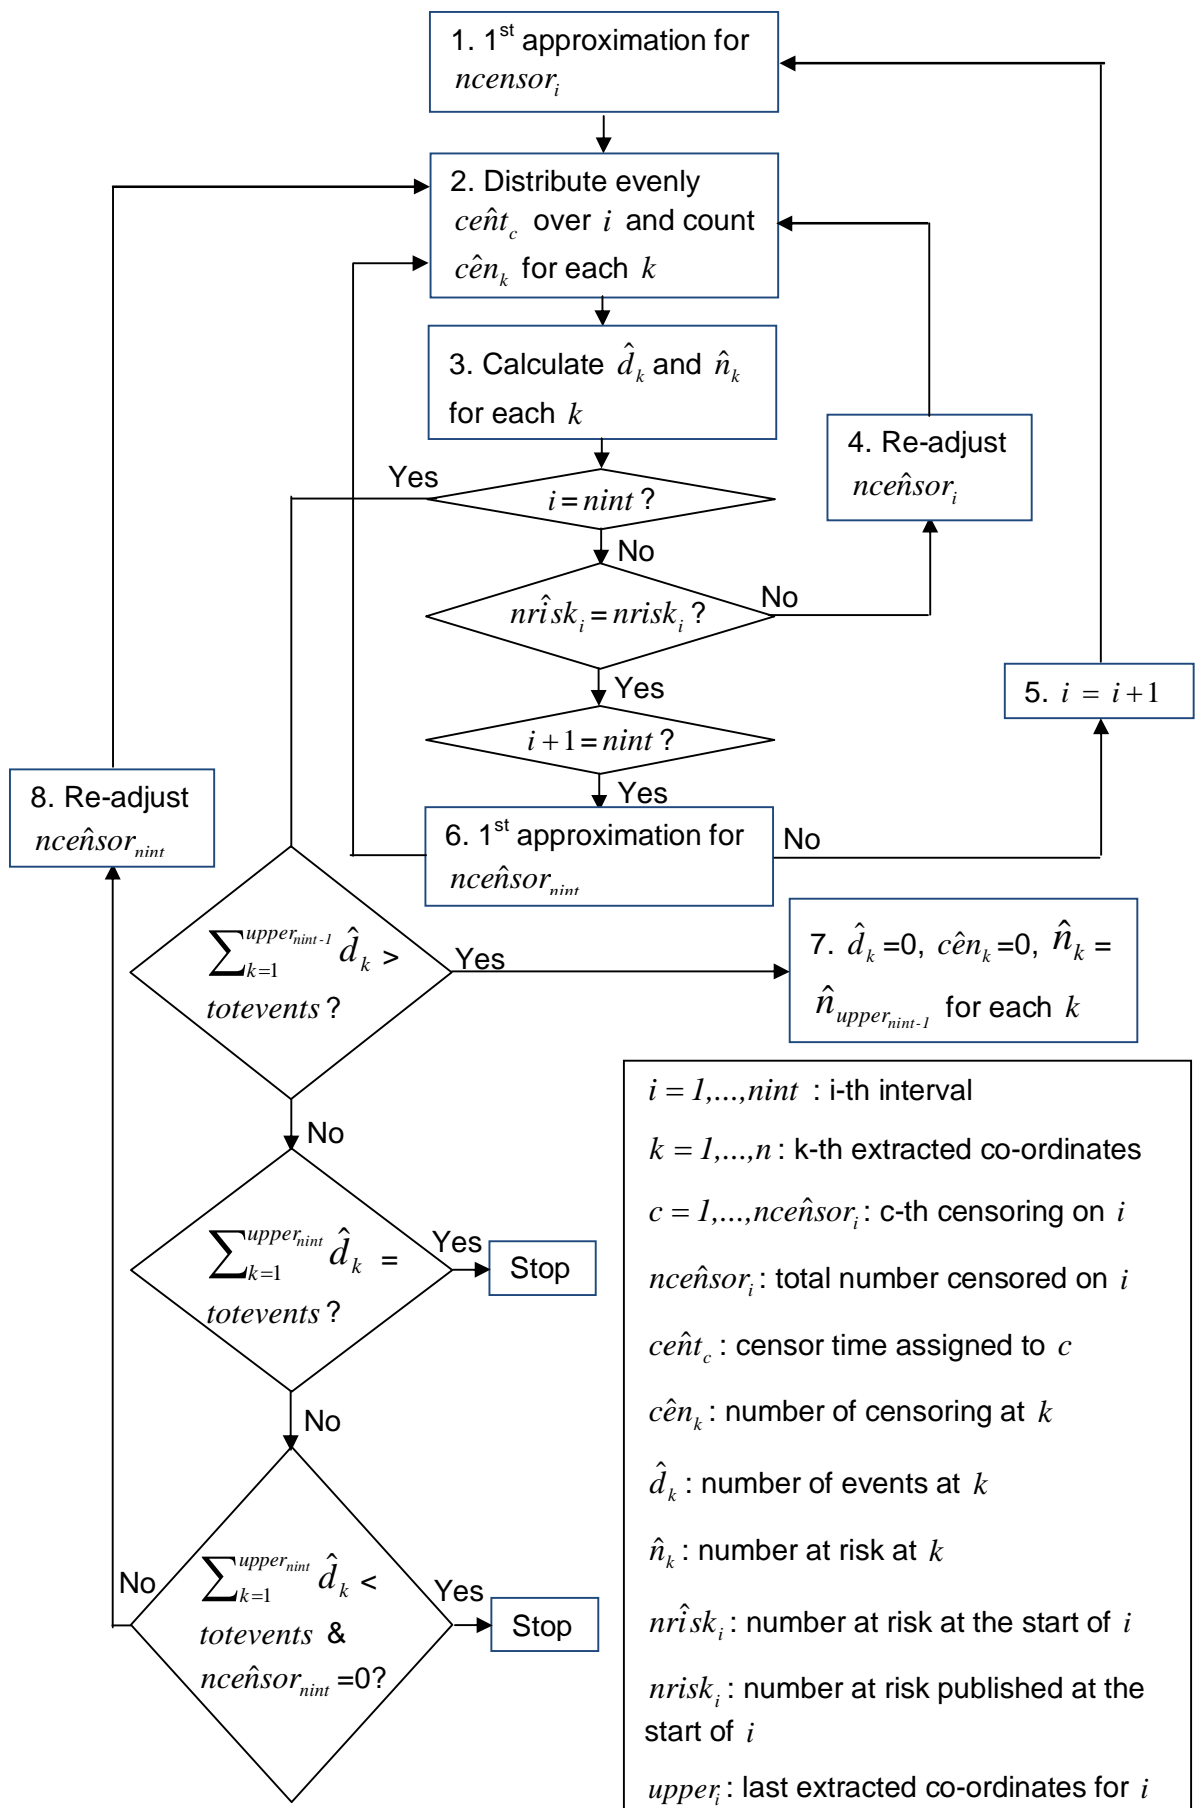

$i = 1, \dots, nint$  :  $i$ -th interval  
 $k = 1, \dots, n$  :  $k$ -th extracted co-ordinates  
 $c = 1, \dots, nceñsor_i$  :  $c$ -th censoring on  $i$   
 $nceñsor_i$  : total number censored on  $i$   
 $cêñt_c$  : censor time assigned to  $c$   
 $cêñk$  : number of censoring at  $k$   
 $d_k$  : number of events at  $k$   
 $n_k$  : number at risk at  $k$   
 $nrîsk_i$  : number at risk at the start of  $i$   
 $nrisk_i$  : number at risk published at the start of  $i$   
 $upper_i$  : last extracted co-ordinates for  $i$
